# Supplementary material
Source: HighWire-hosted journal article supplement (https://jech.bmj.com/content/71/10/990)
Supplement: inline-supplementary-material-1 [file inline-supplementary-material-1.pdf]

**Supplementary Table 1** Univariable analysis showing independent covariate associations for prenatal alcohol exposure (PAE), cognition, language and motor development (Bayley III) at 24 months

| Characteristic                                       | Exposure* |        |         | Child outcome score (Bayley III) at 24 months** |           |         |          |           |         |       |           |         |
|------------------------------------------------------|-----------|--------|---------|-------------------------------------------------|-----------|---------|----------|-----------|---------|-------|-----------|---------|
|                                                      | N         | (%)    | p value | Cognition                                       |           |         | Language |           |         | Motor |           |         |
|                                                      |           |        |         | Mean                                            | β         | p value | Mean     | β         | p value | Mean  | β         | p value |
| <b>Maternal age (n=554)</b>                          |           |        | <0.01   |                                                 |           |         |          |           |         |       |           |         |
| <25 years                                            | 11        | (2.0)  |         | 94.6                                            | -12.85    | <0.01   | 95.5     | -13.0     | 0.02    | 107.9 | -2.18     | 0.61    |
| 25-29 years                                          | 132       | (23.8) |         | 106.3                                           | -1.11     | 0.44    | 106.3    | -2.2      | 0.28    | 110.1 | -0.04     | 0.98    |
| 30-34 years                                          | 246       | (44.4) |         | 107.4                                           | Reference |         | 108.5    | Reference |         | 110.1 | Reference |         |
| >=35 years                                           | 165       | (28.8) |         | 106.1                                           | -1.28     | 0.34    | 106.4    | -2.0      | 0.27    | 112.4 | 2.36      | 0.09    |
| <b>Maternal education (n=553)</b>                    |           |        | 0.37    |                                                 |           |         |          |           |         |       |           |         |
| Secondary                                            | 65        | (11.7) |         | 102.2                                           | -6.28     | <0.001  | 101.9    | -7.43     | <0.01   | 106.5 | -5.80     | <0.01   |
| Trade/Diploma                                        | 115       | (20.8) |         | 102.5                                           | -6.03     | <0.001  | 102.8    | -6.53     | <0.01   | 108.3 | -3.99     | <0.01   |
| Tertiary                                             | 373       | (67.3) |         | 108.5                                           | Reference |         | 109.3    | Reference |         | 112.3 | Reference |         |
| <b>Household income (n=543)</b>                      |           |        | 0.21    |                                                 |           |         |          |           |         |       |           |         |
| <\$40,000                                            | 60        | (11.0) |         | 102.3                                           | -5.96     | <0.01   | 102.7    | -6.93     | <0.01   | 108.7 | -3.72     | 0.06    |
| \$40-70,000                                          | 73        | (13.4) |         | 102.9                                           | -5.42     | <0.01   | 102.1    | -7.50     | <0.01   | 106.6 | -5.75     | <0.01   |
| \$71-100,000                                         | 143       | (26.3) |         | 106.7                                           | -1.62     | 0.24    | 106.3    | -3.34     | 0.08    | 110.5 | -1.93     | 0.18    |
| >\$100,000                                           | 267       | (49.2) |         | 108.3                                           | Reference |         | 109.6    | Reference |         | 112.4 | Reference |         |
| <b>Region of residence (n=551)</b>                   |           |        | 0.30    |                                                 |           |         |          |           |         |       |           |         |
| Metropolitan                                         | 537       | (97.5) |         | 106.5                                           | Reference |         | 107.1    | Reference |         | 110.8 | Reference |         |
| Rural                                                | 14        | (2.5)  |         | 106.1                                           | -0.42     | 0.91    | 102.4    | -4.68     | 0.35    | 111.9 | 1.06      | 0.78    |
| <b>Socioeconomic index (n=552)</b>                   |           |        | 0.60    |                                                 |           |         |          |           |         |       |           |         |
| Lowest quartile                                      | 22        | (4.0)  |         | 106.6                                           | -0.22     | 0.94    | 104.7    | -3.39     | 0.41    | 111.3 | -0.04     | 0.99    |
| Second quartile                                      | 55        | (10.0) |         | 104.2                                           | -2.63     | 0.18    | 104.4    | -3.76     | 0.17    | 111.0 | -0.25     | 0.90    |
| Third quartile                                       | 169       | (30.6) |         | 106.5                                           | -0.31     | 0.81    | 106.2    | -1.93     | 0.28    | 109.8 | -1.51     | 0.26    |
| Highest quartile                                     | 306       | (55.4) |         | 106.8                                           | Reference |         | 108.1    | Reference |         | 111.3 | Reference |         |
| <b>Ethnicity (n=554)</b>                             |           |        | <0.01   |                                                 |           |         |          |           |         |       |           |         |
| Caucasian                                            | 497       | (89.7) |         | 106.5                                           | Reference |         | 107.6    | Reference |         | 110.6 | Reference |         |
| Asian/other                                          | 57        | (10.3) |         | 106.1                                           | -0.40     | 0.83    | 102.8    | -4.83     | 0.06    | 111.9 | 1.27      | 0.51    |
| <b>Language spoken at home (n=517)</b>               |           |        | 0.06    |                                                 |           |         |          |           |         |       |           |         |
| English always                                       | 477       | (92.3) |         | 106.7                                           | Reference |         | 107.7    | Reference |         | 110.8 | Reference |         |
| English sometimes/never                              | 40        | (7.7)  |         | 106.5                                           | -0.22     | 0.92    | 102.4    | -5.23     | 0.09    | 111.4 | 0.63      | 0.78    |
| <b>Parity (n=549)</b>                                |           |        | 0.04    |                                                 |           |         |          |           |         |       |           |         |
| None                                                 | 285       | (51.9) |         | 107.4                                           | Reference |         | 108.0    | Reference |         | 109.9 | Reference |         |
| 1 child                                              | 203       | (37.0) |         | 106.3                                           | -1.07     | 0.38    | 107.1    | -0.87     | 0.61    | 111.3 | 1.35      | 0.29    |
| >1 children                                          | 61        | (11.1) |         | 103.1                                           | -4.24     | 0.02    | 103.4    | -4.56     | 0.08    | 112.9 | 2.97      | 0.13    |
| <b>BMI (n=543)</b>                                   |           |        | 0.04    |                                                 |           |         |          |           |         |       |           |         |
| Normal                                               | 338       | (62.2) |         | 107.7                                           | Reference |         | 108.6    | Reference |         | 111.7 | Reference |         |
| Underweight                                          | 22        | (4.0)  |         | 109.1                                           | 1.40      | 0.63    | 107.6    | -1.04     | 0.80    | 110.9 | -0.78     | 0.80    |
| Overweight                                           | 102       | (18.8) |         | 106.1                                           | -1.61     | 0.28    | 107.6    | -1.05     | 0.61    | 109.6 | -2.10     | 0.18    |
| Obese                                                | 81        | (14.9) |         | 102.0                                           | -5.66     | <0.01   | 99.8     | -8.87     | <0.001  | 108.5 | -3.13     | 0.07    |
| <b>30min moderate exercise in trimester 1(n=551)</b> |           |        | <0.01   |                                                 |           |         |          |           |         |       |           |         |
| None                                                 | 63        | (11.4) |         | 104.4                                           | -1.75     | 0.33    | 105.8    | -0.94     | 0.71    | 111.5 | 1.01      | 0.59    |
| 1-3 days/week                                        | 385       | (69.9) |         | 106.1                                           | Reference |         | 106.8    | Reference |         | 110.5 | Reference |         |
| 4-7 days/week                                        | 103       | (18.7) |         | 108.7                                           | 2.57      | 0.08    | 109.0    | 2.20      | 0.29    | 110.9 | 0.39      | 0.80    |
| <b>Healthy diet (n=553)</b>                          |           |        | 0.51    |                                                 |           |         |          |           |         |       |           |         |
| Lowest tertile                                       | 165       | (29.8) |         | 104.0                                           | -2.73     | 0.05    | 104.0    | -2.78     | 0.16    | 109.1 | -1.69     | 0.25    |
| Second tertile                                       | 194       | (35.1) |         | 106.7                                           | Reference |         | 106.9    | Reference |         | 110.8 | Reference |         |
| Highest tertile                                      | 194       | (35.1) |         | 108.5                                           | 1.73      | 0.20    | 110.1    | 3.28      | 0.08    | 112.1 | 1.26      | 0.37    |
| <b>Folate in trimester 1 (n=554)</b>                 |           |        | 0.30    |                                                 |           |         |          |           |         |       |           |         |
| None                                                 | 21        | (3.8)  |         | 99.5                                            | -8.29     | <0.01   | 100.7    | -7.72     | 0.07    | 106.3 | -5.17     | 0.10    |
| <400ug                                               | 156       | (28.2) |         | 105.2                                           | -2.65     | 0.05    | 105.1    | -3.26     | 0.09    | 109.8 | -1.68     | 0.23    |
| 400-500ug                                            | 251       | (45.3) |         | 107.8                                           | Reference |         | 108.4    | Reference |         | 111.5 | Reference |         |
| 501-800ug                                            | 96        | (17.3) |         | 106.3                                           | -1.56     | 0.33    | 109.1    | 0.71      | 0.75    | 112.1 | 0.66      | 0.69    |
| >800ug                                               | 30        | (5.4)  |         | 108.2                                           | 0.36      | 0.89    | 104.5    | -3.92     | 0.27    | 108.3 | -3.13     | 0.24    |
| <b>Folate in trimesters 2/3 (n=554)</b>              |           |        | 0.63    |                                                 |           |         |          |           |         |       |           |         |
| None                                                 | 53        | (9.6)  |         | 100.9                                           | -6.02     | <0.01   | 100.6    | -7.62     | <0.01   | 107.4 | -4.29     | 0.04    |
| <400ug                                               | 111       | (20.0) |         | 106.0                                           | -1.02     | 0.51    | 105.3    | -2.93     | 0.17    | 109.0 | -2.64     | 0.10    |
| 400-500ug                                            | 216       | (39.0) |         | 107.0                                           | Reference |         | 108.2    | Reference |         | 111.7 | Reference |         |
| 501-800ug                                            | 146       | (26.3) |         | 108.3                                           | 1.29      | 0.37    | 108.8    | 0.55      | 0.78    | 111.7 | 0.04      | 0.98    |
| >800ug                                               | 28        | (5.0)  |         | 106.4                                           | -0.54     | 0.84    | 109.3    | 1.08      | 0.77    | 111.5 | -0.14     | 0.96    |
| <b>Smoking in pregnancy (n=554)</b>                  |           |        | 0.03    |                                                 |           |         |          |           |         |       |           |         |
| No                                                   | 466       | (84.1) |         | 107.2                                           | Reference |         | 107.9    | Reference |         | 111.2 | Reference |         |
| Smoked pre-aware                                     | 63        | (11.4) |         | 104.8                                           | -2.31     | 0.20    | 106.6    | -1.30     | 0.60    | 109.8 | -1.43     | 0.44    |
| Continued smoking                                    | 25        | (4.5)  |         | 98.6                                            | -8.55     | <0.01   | 93.6     | -14.32    | <0.001  | 103.6 | -7.60     | <0.01   |

\* Pearson chi2 p value for categorical variables; univariate linear regression p value for continuous variables

\*\* Univariate linear regression

**SupplementaryTable 1 continued** Univariable analysis showing independent covariate associations for prenatal alcohol exposure (PAE), cognition, language and motor development (Bayley III) at 24 months

|                                                                 |      |        | Exposure* | Child outcome score (Bayley III) at 24 months** |           |         |          |           |         |       |           |         |
|-----------------------------------------------------------------|------|--------|-----------|-------------------------------------------------|-----------|---------|----------|-----------|---------|-------|-----------|---------|
|                                                                 |      |        | PAE       | Cognition                                       |           |         | Language |           |         | Motor |           |         |
|                                                                 | N    | (%)    | p value   | Mean                                            | $\beta$   | p value | Mean     | $\beta$   | p value | Mean  | $\beta$   | p value |
| <b>Age started drinking regularly (n=554)</b>                   |      |        | <0.001    |                                                 |           |         |          |           |         |       |           |         |
| < 18 years                                                      | 217  | (39.2) |           | 106.4                                           | -0.14     | 0.91    | 107.9    | 1.11      | 0.52    | 109.8 | <1.38     | 0.28    |
| >= 18 years                                                     | 257  | (46.4) |           | 106.5                                           | Reference |         | 106.8    | Reference |         | 111.2 | Reference |         |
| Not regularly                                                   | 80   | (14.4) |           | 106.8                                           | 0.23      | 0.89    | 105.6    | -1.18     | 0.62    | 111.9 | 0.67      | 0.71    |
| <b>Biological father pre-pregnancy drinking pattern (n=536)</b> |      |        | <0.001    |                                                 |           |         |          |           |         |       |           |         |
| Abstinent                                                       | 28   | (5.2)  |           | 107.3                                           | Reference |         | 104.4    | Reference |         | 109.0 | Reference |         |
| Light & occasional                                              | 158  | (29.5) |           | 108.1                                           | 0.72      | 0.79    | 108.7    | 4.29      | 0.26    | 111.3 | 2.37      | 0.40    |
| Low moderate                                                    | 155  | (28.9) |           | 106.4                                           | -0.97     | 0.72    | 106.8    | 2.39      | 0.53    | 110.8 | 1.86      | 0.51    |
| Moderate                                                        | 151  | (28.2) |           | 106.0                                           | -1.36     | 0.62    | 107.0    | 2.63      | 0.49    | 111.4 | 2.43      | 0.39    |
| Frequent                                                        | 44   | (8.2)  |           | 103.4                                           | -3.91     | 0.22    | 105.3    | 0.93      | 0.74    | 108.8 | -0.19     | 0.95    |
| <b>Child sex (n=554)</b>                                        |      |        | 0.51      |                                                 |           |         |          |           |         |       |           |         |
| Male                                                            | 279  | (50.4) |           | 103.8                                           | Reference |         | 102.0    | Reference |         | 109.2 | Reference |         |
| Female                                                          | 275  | (49.6) |           | 109.2                                           | 5.37      | <0.001  | 112.3    | 5.37      | <0.001  | 112.3 | 3.17      | <0.01   |
| <b>Breastfeeding (n=517)</b>                                    |      |        | <0.01     |                                                 |           |         |          |           |         |       |           |         |
| None                                                            | 23   | (4.4)  |           | 101.3                                           | -8.54     | <0.01   | 99.3     | -12.01    | <0.01   | 111.9 | -1.12     | 0.70    |
| < 6 months                                                      | 100  | (19.3) |           | 104.6                                           | -5.29     | <0.01   | 104.4    | -6.90     | <0.01   | 109.4 | -3.69     | 0.02    |
| 6-12 months                                                     | 137  | (26.5) |           | 103.6                                           | -6.27     | <0.001  | 103.5    | -7.85     | <0.001  | 107.6 | -5.39     | <0.001  |
| >12 months                                                      | 257  | (49.7) |           | 109.8                                           | Reference |         | 111.3    | Reference |         | 113.0 | Reference |         |
| <b>General family functioning (n=537)</b>                       |      |        | 0.51      |                                                 |           |         |          |           |         |       |           |         |
| Normal                                                          | 480  | (89.4) |           | 106.7                                           | Reference |         | 107.4    | Reference |         | 110.7 | Reference |         |
| Abnormal                                                        | 57   | (10.6) |           | 105.1                                           | -1.63     | 0.38    | 106.1    | -1.27     | 0.63    | 110.6 | -0.11     | 0.96    |
| <b>Parental warmth (n=539)</b>                                  |      |        | 0.02      |                                                 |           |         |          |           |         |       |           |         |
| Lowest quartile                                                 | 159  | (29.5) |           | 107.0                                           | 0.71      | 0.57    | 107.9    | 1.07      | 0.54    | 110.7 | -0.01     | 0.99    |
| Other quartiles                                                 | 380  | (70.5) |           | 106.3                                           | Reference |         | 106.9    | Reference |         | 110.7 | Reference |         |
| <b>Hostile parenting (n=539)</b>                                |      |        | 0.52      |                                                 |           |         |          |           |         |       |           |         |
| Lowest quartile                                                 | 104  | (80.7) |           | 104.9                                           | 1.99      | 0.17    | 107.7    | 2.81      | 0.16    | 110.6 | -0.77     | 0.61    |
| Other quartiles                                                 | 435  | (19.3) |           | 106.9                                           | Reference |         | 104.9    | Reference |         | 111.3 | Reference |         |
| <b>Maternal rating of self-efficacy (n=531)</b>                 |      |        | 0.66      |                                                 |           |         |          |           |         |       |           |         |
| Low                                                             | 19   | (3.6)  |           | 103.2                                           | -3.51     | 0.26    | 103.3    | -4.03     | 0.35    | 109.7 | -0.99     | 0.76    |
| High                                                            | 512  | (96.4) |           | 106.7                                           | Reference |         | 107.4    | Reference |         | 110.7 | Reference |         |
|                                                                 | Mean | (SD)   | p value   |                                                 | $\beta$   | p value |          | $\beta$   | p value |       | $\beta$   | p value |
| <b>Child birthweight (n=550)</b>                                |      |        |           |                                                 |           |         |          |           |         |       |           |         |
|                                                                 | 3493 | (485)  | 0.39      |                                                 | -0.0002   | 0.87    |          | 0.0008    | 0.62    |       | 0.002     | 0.19    |
| <b>Maternal mental health at 24 months (n=538)</b>              |      |        |           |                                                 |           |         |          |           |         |       |           |         |
| Depression                                                      | 3.58 | (5.86) | 0.70      |                                                 | -0.24     | 0.02    |          | -0.38     | <0.01   |       | -0.18     | 0.07    |
| Anxiety                                                         | 2.62 | (4.48) | 0.80      |                                                 | -0.30     | 0.02    |          | -0.42     | 0.02    |       | -0.20     | 0.14    |
| Stress                                                          | 8.38 | (7.22) | 0.20      |                                                 | -0.02     | 0.84    |          | -0.04     | 0.73    |       | -0.07     | 0.42    |

\* Pearson chi2 p value for categorical variables; univariate linear regression p value for continuous variables

\*\* Univariate linear regression

**Supp Table 2** Mother's response to Bayley III invitation and prenatal alcohol exposure, maternal age and education

|                                                 | Bayley III invitation response <sup>a</sup> |        |          |        |          |        | P value <sup>c</sup> |
|-------------------------------------------------|---------------------------------------------|--------|----------|--------|----------|--------|----------------------|
|                                                 | No response                                 |        | Declined |        | Attended |        |                      |
| Total number                                    | 251                                         |        | 292      |        | 557      |        |                      |
|                                                 | No response                                 |        | Declined |        | Attended |        |                      |
| Prenatal alcohol exposure                       | N                                           | (%)    | N        | (%)    | N        | (%)    |                      |
| Abstinent throughout pregnancy                  | 77                                          | (30.7) | 97       | (33.2) | 127      | (22.8) |                      |
| Low in T1 <sup>b</sup> , abstinent in T2 and T3 | 24                                          | (9.6)  | 37       | (12.7) | 65       | (11.7) |                      |
| Moderate/high in T1, abstinent in T2 and T3     | 33                                          | (13.2) | 48       | (16.4) | 74       | (13.3) |                      |
| Binge pre-aware, abstinent in T2 and T3         | 33                                          | (13.2) | 23       | (7.9)  | 52       | (9.3)  |                      |
| Low in T1, low/moderate in T2 and/or T3         | 17                                          | (6.8)  | 22       | (4.5)  | 61       | (11.0) |                      |
| Moderate in T1, any level in T2 and/or T3       | 36                                          | (14.3) | 33       | (11.3) | 96       | (17.0) |                      |
| Binge pre-aware, low/moderate in T2 and/or T3   | 31                                          | (12.3) | 32       | (11.0) | 82       | (14.7) | 0.008 <sup>d</sup>   |
| <b>Maternal age</b>                             |                                             |        |          |        |          |        |                      |
| <25 years                                       | 23                                          | (9.2)  | 22       | (2.0)  | 11       | (7.5)  |                      |
| 25-29 years                                     | 71                                          | (28.3) | 92       | (31.5) | 134      | (24.1) |                      |
| 30 to 34 years                                  | 85                                          | (33.9) | 113      | (38.7) | 247      | (44.3) | <0.001               |
| 35 years and over                               | 72                                          | (28.7) | 65       | (22.3) | 165      | (29.6) |                      |
| <b>Maternal education</b>                       |                                             |        |          |        |          |        |                      |
| Secondary                                       | 59                                          | (23.6) | 60       | (20.6) | 65       | (11.7) |                      |
| Trade/Diploma                                   | 79                                          | (31.6) | 90       | (30.8) | 116      | (20.9) |                      |
| Tertiary                                        | 112                                         | (44.8) | 142      | (48.6) | 375      | (67.5) | <0.001               |

<sup>a</sup> Excludes 3 non-responders, 4 decliners and 7 attendees whose prenatal alcohol exposure category did not fall into any of the above

<sup>b</sup> T1, T2, T3: Trimesters one, two and three

<sup>c</sup> Pearson chi square test for heterogeneity

<sup>d</sup> p value when omitting abstinent category is 0.125

**Supp Table 3** Mother's response to Bayley III invitation and self-report of child development at 24 months,

|                                                      | Bayley III invitation response |        |          |        |          |        |                      |
|------------------------------------------------------|--------------------------------|--------|----------|--------|----------|--------|----------------------|
|                                                      | No response                    |        | Declined |        | Attended |        | P value <sup>a</sup> |
| Brief Infant-Toddler Social and Emotional Assessment | N                              | (%)    | N        | (%)    | N        | (%)    |                      |
| Possible problem                                     | 4/90                           | (4.4)  | 14/153   | (9.2)  | 54/541   | (10.0) | 0.84                 |
| Possible competence deficit                          | 5/90                           | (5.6)  | 9/155    | (5.8)  | 37/541   | (6.8)  | 0.24                 |
| Infant & Toddler Sensory Profile (< - 1SD)           |                                |        |          |        |          |        |                      |
| Low registration                                     | 12/85                          | (14.1) | 30/152   | (19.7) | 105/523  | (20.1) | 0.43                 |
| Sensation seeking                                    | 14/85                          | (16.5) | 17/145   | (11.7) | 79/525   | (15.1) | 0.53                 |
| Sensory sensitivity                                  | 19/89                          | (21.3) | 32/151   | (21.2) | 90/524   | (17.2) | 0.40                 |
| Sensation avoiding                                   | 16/85                          | (12.3) | 33/154   | (11.0) | 118/533  | (14.7) | 0.79                 |

<sup>a</sup> Pearson chi square test for heterogeneity
